# Supplementary material for: NAD+ modulation with nicotinamide mononucleotide coated 3D printed microneedle implants
Source: Royal Society of Chemistry journal article supplement (doi:10.1039/d4tb01856g), 2025-01-01
Supplement: d4tb01856g1.pdf [file d4tb01856g1.pdf]

# NAD<sup>+</sup> Modulation with Nicotinamide Mononucleotide Coated 3D Printed Microneedle Implants

Masood Ali<sup>a,h</sup>, Wenhao Huang<sup>a</sup>, Yicheng Huang<sup>a</sup>, Xiaoxin Wu<sup>b,c,d</sup>, Sarika Namjoshi<sup>a</sup>, Indira Prasadam<sup>d</sup>, Heather A. E. Benson<sup>e</sup>, Tushar Kumeria<sup>f,g,h\*</sup>, Yousuf Mohammad<sup>a,h\*</sup>

<sup>a</sup>Frazer Institute, Faculty of Medicine, The University of Queensland, Brisbane, QLD 4102, Australia

<sup>b</sup>Department of Orthopaedic Surgery, The Second Xiangya Hospital, Central South University, Changsha 410011, China

<sup>c</sup>Research Centre for Computer-aided Drug Discovery, Shenzhen Institutes of Advanced Technology, Chinese Academy of Sciences, Shenzhen 518005, China

<sup>d</sup>Centre for Biomedical Technologies, School of Mechanical, Medical and Process Engineering, Queensland University of Technology, QLD, 4059, Australia

<sup>e</sup>Curtin Medical School, Curtin University, Bentley, WA, 6102, Australia

<sup>f</sup>School of Materials Science and Engineering, The University of New South Wales, Sydney NSW 2052, Australia

<sup>g</sup>Australian Centre for Nanomedicine, The University of New South Wales, Sydney NSW 2052, Australia

<sup>h</sup>School of Pharmacy, The University of Queensland, Brisbane, QLD 4102, Australia

\*Corresponding authors: Tushar Kumeria ([t.kumeria@unsw.edu.au](mailto:t.kumeria@unsw.edu.au)) and Yousuf Mohammed ([y.mohammed@uq.edu.au](mailto:y.mohammed@uq.edu.au))

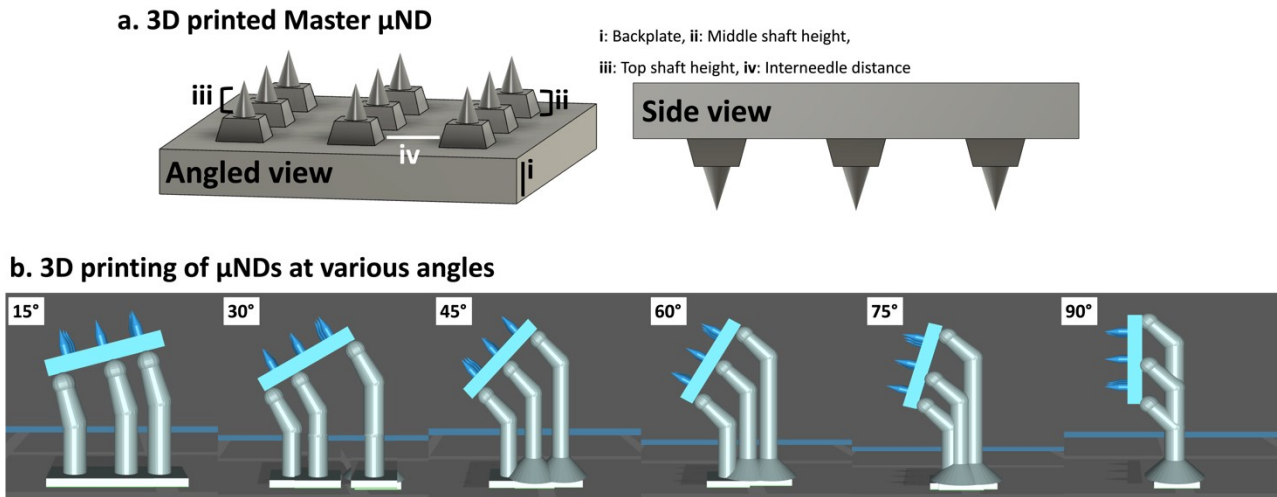

**Figure 1:** Optimisation of 3D printed master  $\mu$ ND arrays. a) 3D printed master  $\mu$ ND array with the various parts of the design include the backplate (i), the middle shaft (ii), the top shaft (iii), and the interneedle distance (iv).

Printing high fidelity master  $\mu$ ND were studied elsewhere [63-67]. The 3D  $\mu$ ND CAD design files (designed in Autodesk Fusion) were exported to STL file format and imported into a print preparation software (ChiTuBox V 1.3.0). The 3D printed master  $\mu$ ND arrays were cleaned as per [67] with Methanol (100%) sonication wash for 8 mins, followed by detergent sonication clean for another 8 mins, to remove any residual uncured/cured resin on the  $\mu$ ND array. Female  $\mu$ ND moulds were then prepared using the 3D printed Master  $\mu$ ND arrays, using an established method with some modifications [66]. Once dried, the master  $\mu$ ND arrays were dip-coated in a silicone oil (WD-40 Inc, Australia) to protect against cure inhibition when pouring PDMS (Polydimethyl-siloxane) solution. The master  $\mu$ ND array was placed needle facing upwards inside 15 mL falcon tube cap, polydimethylsiloxane (PDMS; Sylgard<sup>®</sup> 184, Dow Corning, Midland, MI, USA) with the ratio of 10:1 was then poured on the 3D printed master  $\mu$ ND array, covering the entire array. The PDMS-casted 3D printed master  $\mu$ ND was then degassed at room temperature for 30 min and cured in the oven at 65 °C for 24 h. The 3D master  $\mu$ ND array was slowly peeled off from the PDMS cast. The newly fabricated master female moulds were then stored in nitrogen filled falcon tubes for further use.

## Coating micro-tank

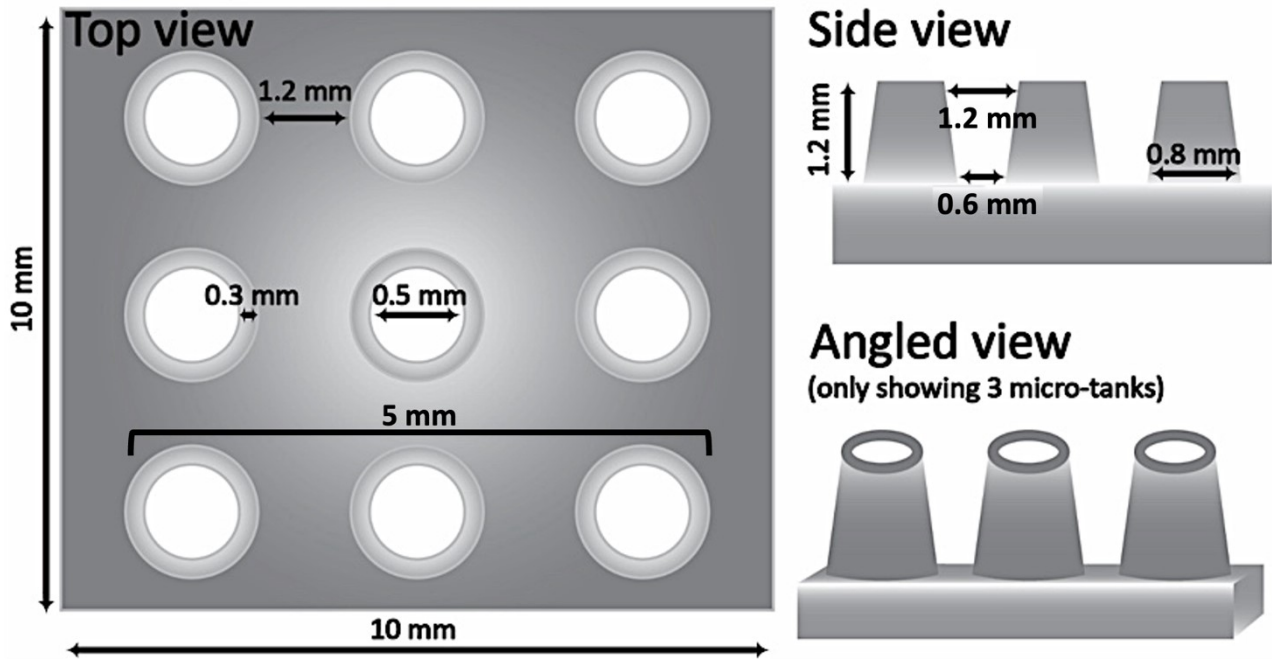

**Figure 2:** Illustrations of the microtanks prepared for the coating of  $\mu$ ND implants in this experiment. The dimensions of the individual micro-tanks: micro-tank inner diameter approximately 500  $\mu$ m and height 1.2 mm, with a 3 X 3 micro-tank array, with the distance between the micro-tanks set to 5 mm in CAD (Autodesk Fusion). The illustration is not up to scale. The micro-tanks are hollow to facilitate filling from the bottom of the base rather than the top, and secondly, any positive pressure or air bubbles created from the dipping of the  $\mu$ NDs will dissipate from the bottom opening of the base.

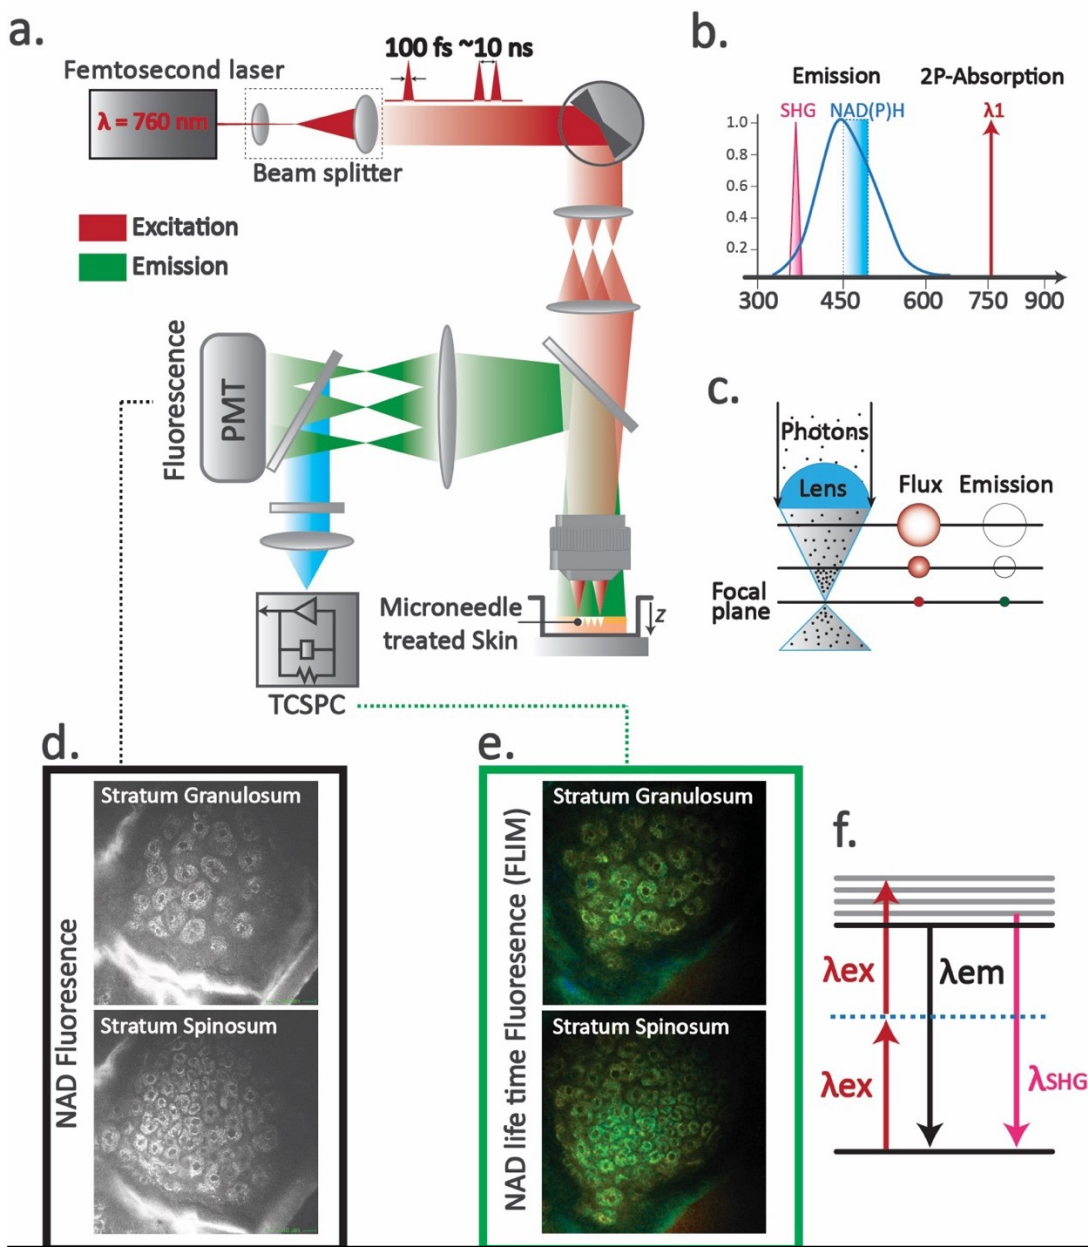

**Figure 3:** Multicolour two-photon excitation of NAD(P)H. (a.) Schematic of a synchronised pulse trains from single-output femtosecond laser used to generate one colour non-linear signals epi-detected in multi-channel spectral detectors. (c.) Two-photon irradiation with NIR illustrating the total flux in each z section in red colour (circle), but excitation only occurs at the focus (green circle). Therefore, fluorescence emission can be seen through pin-point for two-photon. (d.) Gray-scale NAD fluorescence image output from fluorescence detector showing cells from two distinctive skin layer, Stratum granulosum and stratum spinosum. (e.) multi-colour NAD lifetime fluorescence (FLIM) images of the same layers. d. & e. shows fluorescence of excited NAD(P)H molecules within the cells. (f.) Jablonski energy level diagram illustrating two-photon (NIR,  $\lambda_{ex}$ ) exciting a fluorophore molecule to an excited state and the visible fluorescence emitted during relaxation ( $\lambda_{em}$ ), as well as generation of single harmonic generation (SHG).

### a. 3D printed $\mu$ ND master- Print angle optimization

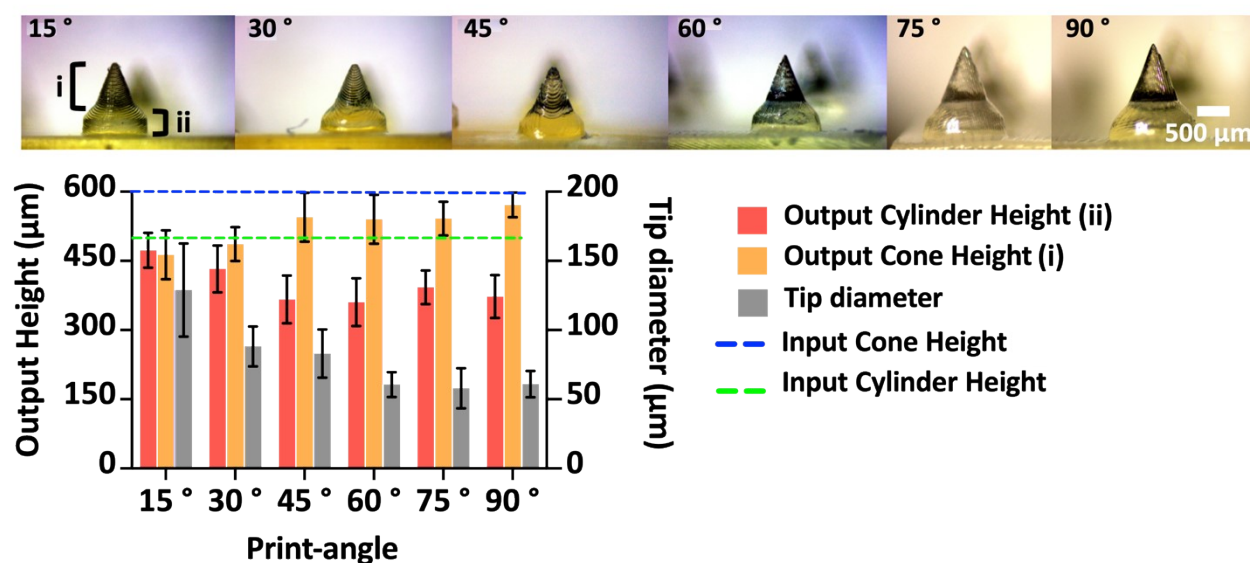

### b. Dimensional comparison between PVP $\mu$ ND arrays vs. Master

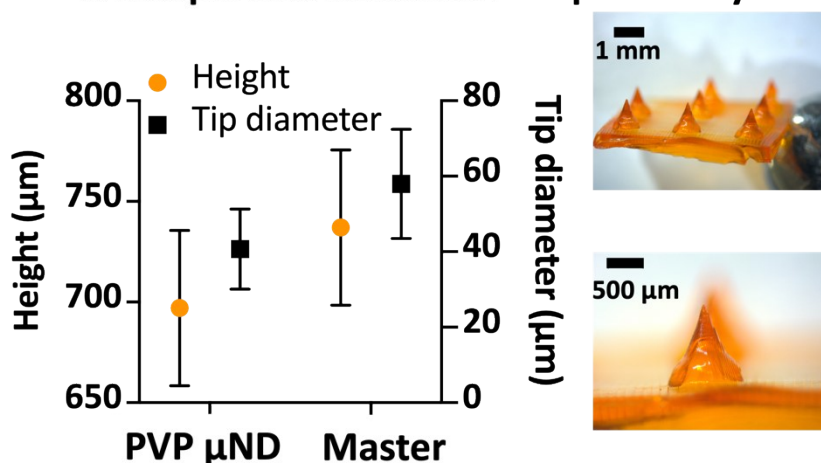

**Figure 4:** 3D master  $\mu$ ND printing optimisation. (a) The  $\mu$ ND master were 3D printed at various angles (15 – 90°), evaluating the three main design factors: output cylinder height (ii), output cone height (i) and tip diameter. (b) Comparison of the dimensional features between PVP  $\mu$ NDs made from master  $\mu$ ND 3D printed at 90°. The two main dimensional parameters investigated were the  $\mu$ ND height and the tip diameter. The microscopy images show PVP  $\mu$ NDs made from the master female mould using solvent casting method. Data was generated using PRISM showing values as AV  $\pm$  SD.

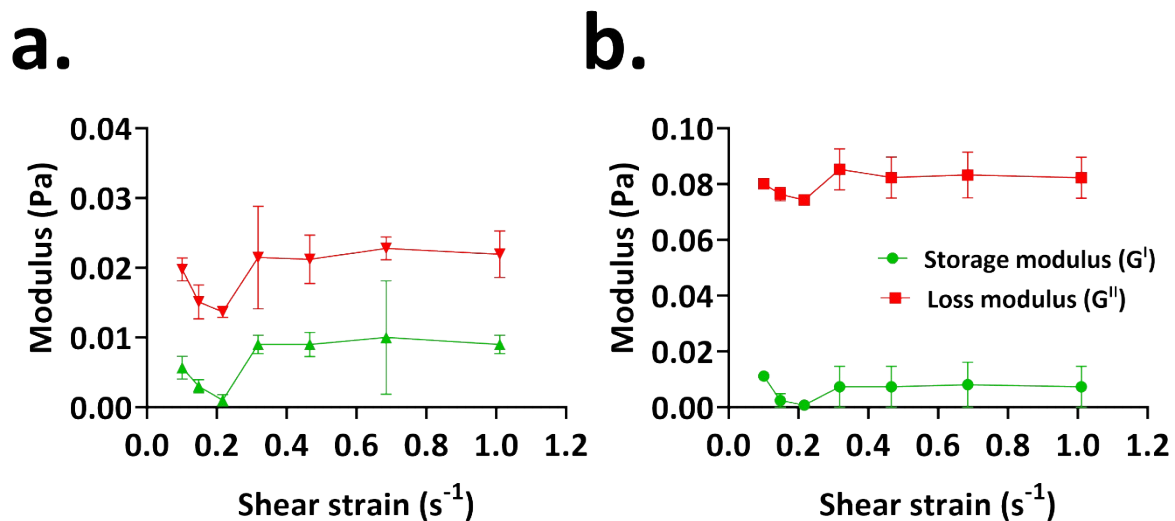

**Figure 5:** Determining the Linear Viscoelastic region (LVR) of (a) coating formulation A (NMN+Sucrose+Tween 20) and (b) coating formulation B (NMN+CMC+Tween 20). Amplitude sweep test was performed to determine the storage modulus ( $G'$ ), and loss modulus ( $G''$ ) at frequency (1 Hz) at room temperature (21–24 °C) collecting 25 points with strain sweep of 0.1-1 % to determine the Linear Viscoelastic Range (LVR). Data were plotted showing  $Av \pm SD$  in PRISM. All measurements were carried out in triplicates.
